# Supplementary material for: An HPLC Method for Microanalysis and Pharmacokinetics of Marine Sulfated Polysaccharide PSS-Loaded Poly Lactic-co-Glycolic Acid (PLGA) Nanoparticles in Rat Plasma
Source: MDPI journal article supplement (doi:10.3390/md11041113), 2013-04-02
Supplement: s1 [file s1]

marinedrugs-11-01113-s001.mol
  corina  04151404513D 1   1.00000     0.00000 
CORINA 3.49 0023  12.04.2013
 42 43  0  0  0  0  0  0  0  0999 V2000
   -0.0187    1.5275    0.0104 C   0  0  0  0  0  0  0  0  0  0  0  0
    0.0021   -0.0041    0.0020 C   0  0  0  0  0  0  0  0  0  0  0  0
    0.7852   -0.4893   -1.2207 C   0  0  0  0  0  0  0  0  0  0  0  0
    2.1062    0.0545   -1.1851 O   0  0  0  0  0  0  0  0  0  0  0  0
    2.1506    1.4824   -1.2231 C   0  0  0  0  0  0  0  0  0  0  0  0
    1.4223    2.0468   -0.0005 C   0  0  0  0  0  0  0  0  0  0  0  0
   -0.7069    2.0027   -1.1483 O   0  0  0  0  0  0  0  0  0  0  0  0
    0.6329   -0.4796    1.1928 O   0  0  0  0  0  0  0  0  0  0  0  0
    1.4151    3.4743   -0.0660 O   0  0  0  0  0  0  0  0  0  0  0  0
    1.5130    1.9474   -2.4144 O   0  0  0  0  0  0  0  0  0  0  0  0
    2.1836    1.5691   -3.6182 C   0  0  0  0  0  0  0  0  0  0  0  0
    3.2053    2.6453   -3.9945 C   0  0  0  0  0  0  0  0  0  0  0  0
    1.1619    1.4279   -4.7507 C   0  0  0  0  0  0  0  0  0  0  0  0
    0.5061    2.7888   -5.0045 C   0  0  0  0  0  0  0  0  0  0  0  0
    1.5926    3.8178   -5.3272 C   0  0  0  0  0  0  0  0  0  0  0  0
    2.5265    3.8772   -4.2472 O   0  0  0  0  0  0  0  0  0  0  0  0
    0.1621    0.4778   -4.3768 O   0  0  0  0  0  0  0  0  0  0  0  0
   -0.3967    2.6855   -6.1074 O   0  0  0  0  0  0  0  0  0  0  0  0
    2.2721    3.4339   -6.5243 O   0  0  0  0  0  0  0  0  0  0  0  0
    2.7957    4.5642   -7.3029 O   0  0  0  0  0  0  0  0  0  0  0  0
    3.4752    4.1803   -8.4999 C   0  0  0  0  0  0  0  0  0  0  0  0
    2.4751    4.1168   -9.6561 C   0  0  0  0  0  0  0  0  0  0  0  0
    3.2026    3.7058  -10.9377 C   0  0  0  0  0  0  0  0  0  0  0  0
    2.2001    3.5239  -12.0481 C   0  0  0  0  0  0  0  0  0  0  0  0
    3.9541    6.4668   -9.1189 O   0  0  0  0  0  0  0  0  0  0  0  0
    4.5619    5.2082   -8.8215 C   0  0  0  0  0  0  0  0  0  0  0  0
    1.4601    3.1569   -9.3557 O   0  0  0  0  0  0  0  0  0  0  0  0
    3.8978    2.4769  -10.7176 O   0  0  0  0  0  0  0  0  0  0  0  0
    2.0921    2.4524  -12.5946 O   0  0  0  0  0  0  0  0  0  0  0  0
    0.1570   -1.7317    1.6331 *   0  0  0  0  0  0  0  0  0  0  0  0
    5.4768    5.3603   -7.6337 C   0  0  0  0  0  0  0  0  0  0  0  0
    5.5278    6.4121   -7.0412 O   0  0  0  0  0  0  0  0  0  0  0  0
    6.2349    4.3273   -7.2338 O   0  0  0  0  0  0  0  0  0  0  0  0
    7.4099    4.6265   -5.6559 Na  0  0  0  0  0  0  0  0  0  0  0  0
    4.1796    2.8319   -2.8601 C   0  0  0  0  0  0  0  0  0  0  0  0
    4.2192    3.8824   -2.2643 O   0  0  0  0  0  0  0  0  0  0  0  0
    5.0035    1.8312   -2.5115 O   0  0  0  0  0  0  0  0  0  0  0  0
    6.2534    2.1744   -1.0015 Na  0  0  0  0  0  0  0  0  0  0  0  0
    0.8607   -1.9943   -1.2043 C   0  0  0  0  0  0  0  0  0  0  0  0
    1.9288   -2.5443   -1.0751 O   0  0  0  0  0  0  0  0  0  0  0  0
   -0.2586   -2.7239   -1.3332 O   0  0  0  0  0  0  0  0  0  0  0  0
   -0.0558   -4.7033   -1.2994 Na  0  0  0  0  0  0  0  0  0  0  0  0
  1  2  1  0      
  5  6  1  0      
  6  1  1  0      
  1  7  1  0      
  2  8  1  0      
  6  9  1  0      
  5 10  1  0      
  3  4  1  0      
  5  4  1  0      
  2  3  1  0      
 10 11  1  0      
 11 12  1  0      
 15 16  1  0      
 16 12  1  0      
 13 17  1  0      
 14 18  1  0      
 11 13  1  0      
 13 14  1  0      
 15 14  1  0      
 15 19  1  0      
 19 20  1  0      
 20 21  1  0      
 25 26  1  0      
 26 21  1  0      
 22 27  1  0      
 23 28  1  0      
 24 29  2  0      
 24 23  1  0      
 23 22  1  0      
 21 22  1  0      
  8 30  1  0      
 26 31  1  0      
 31 32  2  0      
 31 33  1  0      
 33 34  1  0      
 12 35  1  0      
 35 36  2  0      
 35 37  1  0      
 37 38  1  0      
  3 39  1  0      
 39 40  2  0      
 39 41  1  0      
 41 42  1  0      
M  STY  1   1 SUP
M  SLB  1   1   1
M  SAL   1  4  31  32  33  34
M  SBL   1  1  32
M  SMT   1 COONa
M  SBV   1 32   -7.2107    4.5810
M  STY  1   2 SUP
M  SLB  1   2   2
M  SAL   2  4  35  36  37  38
M  SBL   2  1  36
M  SMT   2 COONa
M  SBV   2 36   -6.5436    4.3772
M  STY  1   3 SUP
M  SLB  1   3   3
M  SAL   3  4  39  40  41  42
M  SBL   3  1  40
M  SMT   3 COONa
M  SBV   3 40   -6.5993    3.1544
M  STY  1   4 SRU
M  SLB  1   4   4
M  SCN  1   4 HT 
M  SAL   4 10   1   2   3   4   5   6   7   8  39   9
M  SBL   4  2   7  31
M  SMT   4 m
M  SDI   4  4   -1.6462    0.9799   -1.6462    0.1549
M  SDI   4  4   -5.1615    0.0664   -5.1615    0.8914
M  STY  1   5 SRU
M  SLB  1   5   5
M  SCN  1   5 HT 
M  SAL   5 10  11  12  13  14  15  16  17  18  35  19
M  SBL   5  2  21  11
M  SMT   5 n
M  SDI   5  4    2.1503    0.1308    2.1503   -0.6942
M  SDI   5  4   -0.9317    0.1549   -0.9317    0.9799
M  END
$$$$
