# Supplementary material for: An HPLC Method for Microanalysis and Pharmacokinetics of Marine Sulfated Polysaccharide PSS-Loaded Poly Lactic-co-Glycolic Acid (PLGA) Nanoparticles in Rat Plasma
Source: MDPI journal article supplement (doi:10.3390/md11041113), 2013-04-02
Supplement: s2 [file s2]

marinedrugs-11-01113-s001.mol
  ChemDraw03101421192D

 42 43  0  0  0  0  0  0  0  0999 V2000
   -3.5948    0.7736    0.0000 C   0  0  0  0  0  0  0  0  0  0  0  0
   -4.0073    0.0591    0.0000 C   0  0  0  0  0  0  0  0  0  0  0  0
   -3.2141    0.2859    0.0000 C   0  0  0  0  0  0  0  0  0  0  0  0
   -2.4160    0.0591    0.0000 O   0  0  0  0  0  0  0  0  0  0  0  0
   -2.0034    0.7736    0.0000 C   0  0  0  0  0  0  0  0  0  0  0  0
   -2.7968    0.5470    0.0000 C   0  0  0  0  0  0  0  0  0  0  0  0
   -4.3917    0.5601    0.0000 O   0  0  0  0  0  0  0  0  0  0  0  0
   -4.8042    0.2727    0.0000 O   0  0  0  0  0  0  0  0  0  0  0  0
   -2.7968   -0.2780    0.0000 O   0  0  0  0  0  0  0  0  0  0  0  0
   -1.2890    0.3611    0.0000 O   0  0  0  0  0  0  0  0  0  0  0  0
   -0.5745    0.7736    0.0000 C   0  0  0  0  0  0  0  0  0  0  0  0
    0.2505    0.7736    0.0000 C   0  0  0  0  0  0  0  0  0  0  0  0
    0.0185    0.2000    0.0000 C   0  0  0  0  0  0  0  0  0  0  0  0
    0.2505   -0.5957    0.0000 C   0  0  0  0  0  0  0  0  0  0  0  0
    1.0755   -0.5957    0.0000 C   0  0  0  0  0  0  0  0  0  0  0  0
    0.4894   -0.0089    0.0000 O   0  0  0  0  0  0  0  0  0  0  0  0
    0.8154    0.4135    0.0000 O   0  0  0  0  0  0  0  0  0  0  0  0
    0.8339   -1.1791    0.0000 O   0  0  0  0  0  0  0  0  0  0  0  0
    1.7900   -0.1832    0.0000 O   0  0  0  0  0  0  0  0  0  0  0  0
    2.5107   -0.3802    0.0000 O   0  0  0  0  0  0  0  0  0  0  0  0
    3.3014    0.0157    0.0000 C   0  0  0  0  0  0  0  0  0  0  0  0
    3.7139   -0.6987    0.0000 C   0  0  0  0  0  0  0  0  0  0  0  0
    4.5108   -0.4852    0.0000 C   0  0  0  0  0  0  0  0  0  0  0  0
    5.3052   -0.6987    0.0000 C   0  0  0  0  0  0  0  0  0  0  0  0
    4.8915    0.0203    0.0000 O   0  0  0  0  0  0  0  0  0  0  0  0
    4.0946   -0.1933    0.0000 C   0  0  0  0  0  0  0  0  0  0  0  0
    2.9994   -1.1112    0.0000 O   0  0  0  0  0  0  0  0  0  0  0  0
    4.5108    0.3398    0.0000 O   0  0  0  0  0  0  0  0  0  0  0  0
    5.5187    0.0982    0.0000 O   0  0  0  0  0  0  0  0  0  0  0  0
   -5.5187    0.6852    0.0000 *   0  0  0  0  0  0  0  0  0  0  0  0
    3.0976    0.4160    0.0000 C   0  0  0  0  0  0  0  0  0  0  0  0
    2.3007    0.2025    0.0000 O   0  0  0  0  0  0  0  0  0  0  0  0
    3.6809   -0.1674    0.0000 O   0  0  0  0  0  0  0  0  0  0  0  0
    4.4778    0.0462    0.0000 Na  0  0  0  0  0  0  0  0  0  0  0  0
   -0.0794    1.1791    0.0000 C   0  0  0  0  0  0  0  0  0  0  0  0
   -0.7939    0.7666    0.0000 O   0  0  0  0  0  0  0  0  0  0  0  0
    0.6351    0.7666    0.0000 O   0  0  0  0  0  0  0  0  0  0  0  0
    1.3495    1.1791    0.0000 Na  0  0  0  0  0  0  0  0  0  0  0  0
   -3.5997   -0.5314    0.0000 C   0  0  0  0  0  0  0  0  0  0  0  0
   -4.3142   -0.9439    0.0000 O   0  0  0  0  0  0  0  0  0  0  0  0
   -2.8852   -0.9439    0.0000 O   0  0  0  0  0  0  0  0  0  0  0  0
   -2.1707   -0.5314    0.0000 Na  0  0  0  0  0  0  0  0  0  0  0  0
  1  2  1  0      
  5  6  1  0      
  6  1  1  0      
  1  7  1  0      
  2  8  1  0      
  6  9  1  0      
  5 10  1  0      
  3  4  1  1      
  5  4  1  1      
  2  3  1  1      
 10 11  1  0      
 11 12  1  0      
 15 16  1  0      
 16 12  1  0      
 13 17  1  0      
 14 18  1  0      
 11 13  1  1      
 13 14  1  1      
 15 14  1  1      
 15 19  1  0      
 19 20  1  0      
 20 21  1  0      
 25 26  1  0      
 26 21  1  0      
 22 27  1  0      
 23 28  1  0      
 24 29  2  0      
 24 23  1  1      
 23 22  1  1      
 21 22  1  1      
  8 30  1  0      
 26 31  1  0      
 31 32  2  0      
 31 33  1  0      
 33 34  1  0      
 12 35  1  0      
 35 36  2  0      
 35 37  1  0      
 37 38  1  0      
  3 39  1  0      
 39 40  2  0      
 39 41  1  0      
 41 42  1  0      
M  STY  1   1 SUP
M  SLB  1   1   1
M  SAL   1  4  31  32  33  34
M  SBL   1  1  32
M  SMT   1 COONa
M  SBV   1 32   -7.2107    4.5810
M  STY  1   2 SUP
M  SLB  1   2   2
M  SAL   2  4  35  36  37  38
M  SBL   2  1  36
M  SMT   2 COONa
M  SBV   2 36   -6.5436    4.3772
M  STY  1   3 SUP
M  SLB  1   3   3
M  SAL   3  4  39  40  41  42
M  SBL   3  1  40
M  SMT   3 COONa
M  SBV   3 40   -6.5993    3.1544
M  STY  1   4 SRU
M  SLB  1   4   4
M  SCN  1   4 HT 
M  SAL   4 10   1   2   3   4   5   6   7   8  39   9
M  SBL   4  2   7  31
M  SMT   4 m
M  SDI   4  4   -1.6462    0.9799   -1.6462    0.1549
M  SDI   4  4   -5.1615    0.0664   -5.1615    0.8914
M  STY  1   5 SRU
M  SLB  1   5   5
M  SCN  1   5 HT 
M  SAL   5 10  11  12  13  14  15  16  17  18  35  19
M  SBL   5  2  21  11
M  SMT   5 n
M  SDI   5  4    2.1503    0.1308    2.1503   -0.6942
M  SDI   5  4   -0.9317    0.1549   -0.9317    0.9799
M  END
